# Supplementary material
Source: PubMed Central journal article supplement (PMC2692579)
Supplement: NIHMS98886-supplement-1.pdf [file NIHMS98886-supplement-1.pdf]

HEP-08-1883.R1

Supplement Table 1. Densitometric Values for Figure 1 (% of day 0)

|                                    | GCLC    | GCLM    | GS      |
|------------------------------------|---------|---------|---------|
| <b>Hepatic mRNA levels:</b>        |         |         |         |
| Day 1                              | 183±32* | 133±6*  | 166±15* |
| Day 3                              | 206±13* | 321±69* | 190±18* |
| Day 7                              | 222±34* | 340±66* | 179±17* |
| Day 10                             | 103±9   | 147±42  | 96±7    |
| Day 14                             | 52±6*   | 57±4*   | 68±25   |
| Day 21                             | 34±2*   | 58±5*   | 60±15*  |
| Day 28                             | 43±4*   | 47±6*   | 38±8*   |
| <b>Hepatic protein levels:</b>     |         |         |         |
| Day 1                              | 138±6*  | 97±9    | 126±6*  |
| Day 3                              | 169±9*  | 200±19* | 165±12* |
| Day 7                              | 193±11* | 149±15* | 133±13* |
| Day 10                             | 125±3*  | 92±23   | 101±11  |
| Day 14                             | 50±4*   | 37±8*   | 81±5*   |
| Day 21                             | 48±5*   | 41±10*  | 72±6*   |
| Day 28                             | 48±8*   | 39±6*   | 55±8*   |
| <b>Hepatocytes protein levels:</b> |         |         |         |
| Day 1                              | 265±27* | 244±47* | 128±10  |
| Day 3                              | 375±36* | 368±15* | 146±6*  |
| Day 7                              | 168±20* | 113±39  | 94±6    |
| Day 10                             | 67±5*   | 69±3*   | 85±2*   |
| Day 14                             | 59±3*   | 55±3*   | 53±2*   |
| Day 21                             | 54±4*   | 58±2*   | 48±5*   |
| Day 28                             | 50±8*   | 40±7*   | 31±3*   |

Results are mean±SEM from 3 to 4 mice for each group.

\*p<0.05 vs. Day 0.

**Supplement Table 2. Densitometric Values for Figure 2 (% of day 0)**

|                                | c-Fos   | c-Jun   | p50     | p65     | Nrf1    | Nrf2    | c-Myc   |
|--------------------------------|---------|---------|---------|---------|---------|---------|---------|
| <b>Hepatic mRNA levels:</b>    |         |         |         |         |         |         |         |
| Day 1                          | 265±28* | 234±23* | 118±10  | 140±18  | 92±5    | 111±2   |         |
| Day 3                          | 180±20* | 258±24* | 159±25  | 172±20* | 96±6    | 119±5   |         |
| Day 7                          | 133±13  | 227±12* | 141±20  | 150±12* | 89±10   | 148±6*  |         |
| Day 10                         | 116±13  | 138±5*  | 153±26  | 202±11* | 82±8    | 104±2   |         |
| Day 14                         | 101±9   | 121±4*  | 159±23  | 177±5*  | 78±11   | 86±5    |         |
| Day 21                         | 80±5    | 95±5    | 177±18* | 175±7*  | 102±4   | 91±10   |         |
| Day 28                         | 76±3    | 99±2    | 178±19* | 165±2*  | 83±8    | 83±8    |         |
| <b>Hepatic protein levels:</b> |         |         |         |         |         |         |         |
| Day 1                          | 193±23* | 168±11* | 93±2    | 89±5    | 141±2*  | 195±5*  | 139±10* |
| Day 3                          | 146±12* | 173±10* | 85±20   | 78±13   | 120±5   | 220±15* | 256±21* |
| Day 7                          | 147±20  | 240±28* | 86±15   | 118±10  | 205±10* | 272±5*  | 264±20* |
| Day 10                         | 105±3   | 98±2    | 138±13  | 110±10  | 202±6*  | 228±6*  | 251±17* |
| Day 14                         | 80±5    | 82±10   | 149±5*  | 180±11* | 236±22* | 180±10* | 251±18* |
| Day 21                         | 89±4    | 79±11   | 146±7*  | 169±13* | 115±10  | 93±2    | 285±19* |
| Day 28                         | 105±2   | 76±8    | 165±8*  | 171±5*  | 109±5   | 132±11  | 268±14* |

Results are mean±SEM from 3 to 4 mice for each group.

\*p<0.05 vs. Day 0.

HEP-08-1883.R1

**Supplement Table 3. Densitometric Values for Figure 4 (% of day 0)**

|                                        | c-Maf   | MafF  | MafK    | MafG    | Bach1  |
|----------------------------------------|---------|-------|---------|---------|--------|
| <b>Hepatic nuclear protein levels:</b> |         |       |         |         |        |
| Day 1                                  | 182±8*  | 88±5  | 137±3*  | 129±3*  | 115±10 |
| Day 3                                  | 204±6*  | 116±6 | 281±10* | 169±16* | 124±13 |
| Day 7                                  | 345±12* | 94±5  | 270±16* | 167±14* | 107±3  |
| Day 10                                 | 248±5*  | 82±10 | 225±12* | 267±32* | 162±10 |
| Day 14                                 | 563±22* | 68±7  | 358±26* | 317±42* | 141±15 |
| Day 21                                 | 498±20* | 63±8  | 524±40* | 332±44* | 122±13 |
| Day 28                                 | 406±13* | 93±4  | 423±23* | 333±43* | 90±5   |

Results are mean±SEM from 3 to 4 mice for each group.

\*p<0.05 vs. Day 0.

**Supplement Table 4. Densitometric Values for Figure 6 (% of Sham controls)**

|                                        | BDL     | BDL+UDCA | BDL+SAMe | BDL+UDCA and SAMe |
|----------------------------------------|---------|----------|----------|-------------------|
| <b>Hepatic nuclear protein levels:</b> |         |          |          |                   |
| MafF                                   | 104±7   | 99±3     | 101±6    | 97±7              |
| c-Maf                                  | 490±49* | 277±11*† | 314±24*† | 80±12††           |
| MafK                                   | 258±35* | 162±29*† | 120±27†  | 105±1†            |
| MafB                                   | 111±10  | 133±38   | 137±15   | 102±5             |
| MafG                                   | 264±28* | 146±20†  | 113±25†  | 96±14†            |
| Nrf2                                   | 100±19  | 155±7*†  | 171±13*† | 328±20*††         |
| Bach1                                  | 92±14   | 104±7    | 72±13    | 107±12            |

Results are mean±SEM from 3 to 4 mice for each group.

\*p<0.05 vs. Sham, †p<0.05 vs. BDL, ††p<0.05 vs. BDL and BDL+UDCA or BDL+SAMe
